# Supplementary material for: P2X7 Receptor Agonist 2′(3′)-O-(4-Benzoylbenzoyl)ATP Differently Modulates Cell Viability and Corticostriatal Synaptic Transmission in Experimental Models of Huntington’s Disease
Source: Frontiers journal article supplement (doi:10.3389/fphar.2020.633861), 2021-02-19
Supplement: Data_Sheet_1.PDF [file Data_Sheet_1.PDF]

Martire et al.

# Supplemental Figures

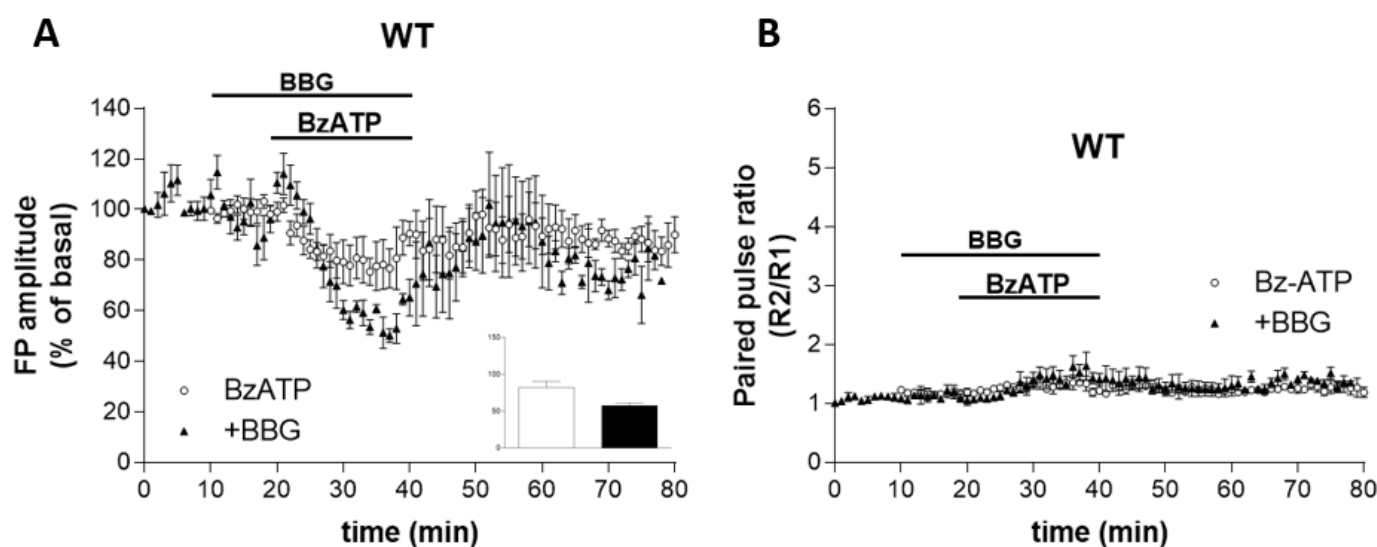

**Figure S1.**

*BzATP-induced depression of corticostriatal synaptic transmission in WT mice is not reversed by the P2X7R antagonist Coomassie Brilliant Blue G (BBG)*

In WT mice, the inhibitory effect of BzATP (50  $\mu$ M for 20 min) on FP ( $82.08 \pm 8.12\%$  of basal,  $n = 4$ ) was not prevented by the P2X7R antagonist BBG (1  $\mu$ M, for 30 min) ( $57.42 \pm 3.43\%$ , of basal  $n = 3$ , panel A). On the contrary, a slight and non-significant worsening was induced. The trend of the mean PPR resulted superimposable with or without BBG (panel B), indicating a substantial absence of any effect. According to Jiang et al. (2000), BBG 1  $\mu$ M is below the IC(50) values for inhibition of the other P2XRs, thus suggesting P2X7R selectivity. BBG (Sigma-Aldrich) was dissolved in distilled water.

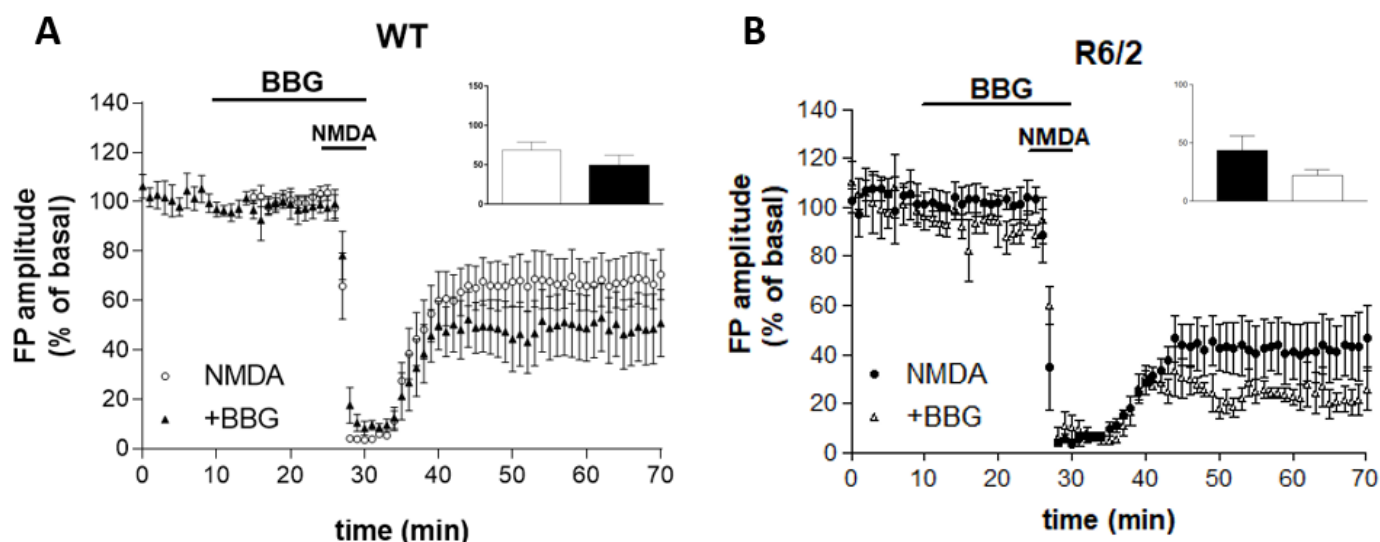

**Figure S2.**

*P2X7R antagonist BBG did not reduce NMDA toxicity in corticostriatal slices from R6/2 and WT mice*

The NMDA experimental paradigm has been already used by our group to assess the role of A<sub>2A</sub> (Martire et al., 2007) and A<sub>1</sub> (Ferrante et al., 2014) receptors in excitotoxicity in corticostriatal slices from WT and R6/2 mice. NMDA (75  $\mu$ M) is applied to the slices over 5 min, inducing a reduction of FP amplitude which results increased in R6/2 mice. In WT mice (panel A) the recovery of the FP after NMDA application ( $68.31 \pm 10.44\%$  of basal after 40 min of washout,  $n = 7$ ) was not significantly affected by the BBG treatment (1  $\mu$ M, for 20 min) ( $48.32 \pm 13.80\%$  of basal after 40 min of washout,  $n = 7$ ). In R6/2 mice (panel B) NMDA toxicity was higher ( $43.20 \pm 12.68\%$  of basal after 40 min of washout,  $n = 3$ ) than in WT mice, but also in this case BBG did not exert a protective action; on the contrary, a worsening, even if non-significant, was induced ( $21.69 \pm 5.36\%$  of basal after 40 min of washout,  $n = 4$ ). NMDA (Sigma-Aldrich) was dissolved in NaOH 0.1 N.

## References

- Ferrante, A., Martire, A., Peponi, R., Varani, K., Vincenzi, F., Ferraro, L., et al. (2014). Expression, pharmacology and functional activity of adenosine A1 receptors in genetic models of Huntington's disease. *Neurobiol. Dis.* 71, 193–204. doi:10.1016/j.nbd.2014.08.013.
- Jiang, L.H., Mackenzie, A.B., North, R.A., Surprenant, A. (2000). Brilliant blue G selectively blocks ATP-gated rat P2X(7) receptors. *Mol. Pharmacol.* 58, 82-88. PMID: 10860929.
- Martire, A., Calamandrei, G., Felici, F., Scattoni, M. L., Lastoria, G., Domenici, M. R., et al. (2007). Opposite effects of the A2A receptor agonist CGS21680 in the striatum of Huntington's disease versus wild-type mice. *Neurosci. Lett.* 417, 78–83. doi:S0304-3940(07)00189-9 [pii].
